# Supplementary material for: Glacial–interglacial seawater isotope change near the Chilean Margin as reflected by δ 2 H values of C 37 alkenones
Source: Copernicus journal article supplement (doi:10.5194/cp-19-1919-2023), 2023-10-12
Supplement: Supplementary file 1 [file cp-19-1919-2023-supplement.zip]

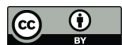

## *Supplement of*

# **Glacial–interglacial seawater isotope change near the Chilean Margin as reflected by $\delta^2\text{H}$ values of $\text{C}_{37}$ alkenones**

**Katrin Hättig et al.**

*Correspondence to:* Katrin Hättig (katrin.haettig@nioz.nl)

- cp-19-1919-2023-supplement-title-page.pdf
- Supplement
  - Hydrogen and Oxygen Isotopes-ODP1235-updated.xlsx
  - Supplementary Information-KH.docx

The copyright of individual parts of the supplement might differ from the article licence.
